# Supplementary material for: Two Novel Yersinia pestis Bacteriophages with a Broad Host Range: Potential as Biocontrol Agents in Plague Natural Foci
Source: MDPI journal article supplement (doi:10.3390/v14122740), 2022-12-08
Supplement: s1 [file s1]

Supplemental Table S1. Genomic Features of bacteriophages in this study

| No. | phage                            | Isolation source of host bacteria  | Genome size(kb) | Total CDSs | GC(%) | tRNA | Reference     | GenBank Accession |
|-----|----------------------------------|------------------------------------|-----------------|------------|-------|------|---------------|-------------------|
| 1   | <i>Yersinia</i> vB_YpeM_MHS112   | <i>Yersinia pestis</i>             | 170.51          | 303        | 40.5  | 2    | In this study | OP750247          |
| 2   | <i>Yersinia</i> vB_YpeM_GMS130   | <i>Yersinia pestis</i>             | 168.55          | 289        | 40.5  | 3    | In this study | OP750248          |
| 3   | <i>Aeromonas</i> phage 44RR2.8t  | <i>Aeromonas salmonicida</i>       | 173.59          | 269        | 43.9  | 17   | [1]           | NC_005135         |
| 4   | <i>Aeromonas</i> phage 65        | <i>Aeromonas salmonicida</i>       | 235.23          | 454        | 37.2  | 16   | [1]           | NC_015251         |
| 5   | <i>Aeromonas</i> phage Aeh1      | <i>Aeromonas hydrophila</i>        | 233.23          | 375        | 42.8  | 23   | [1]           | NC_005260         |
| 6   | <i>Enterobacteria</i> phage AR1  | <i>Escherichia coli</i> O157:H7    | 167.44          | 291        | 35.3  | 10   | [2]           | NC_027983         |
| 7   | <i>Enterobacteria</i> phage JS10 | <i>Escherichia coli</i> K12        | 171.45          | 268        | 39.5  | 3    | [3]           | NC_012741         |
| 8   | <i>Enterobacteria</i> phage JS98 | <i>Escherichia coli</i>            | 170.52          | 269        | 39.5  | 3    | [4]           | NC_010105         |
| 9   | <i>Enterobacteria</i> phage RB43 | <i>Enterobacteriaceae</i>          | 180.500         |            | 43.2  | 1    |               | NC_007023         |
| 10  | <i>Enterobacteria</i> phage RB49 | <i>Escherichia coli</i>            | 164.02          | 279        | 40.4  | 0    | [1, 5]        | NC_005066         |
| 11  | <i>Enterobacteria</i> phage RB69 | <i>Escherichia coli</i>            | 167.56          | 275        | 37.7  | 2    | [1, 5]        | NC_004928         |
| 12  | <i>Enterobacteria</i> phage T4   | <i>Escherichia coli</i>            | 168.9           | 288        | 35.3  | 8    | [6]           | NC_000866         |
| 13  | <i>Vibrio</i> phage KVP40        | <i>Vibrio parahaemolyticus</i>     | 244.83          | 415        | 42.6  | 29   | [7]           | NC_005083         |
| 14  | <i>Vibrio</i> phage nt-1         | <i>Vibrio natriegens</i> HER1138   | 247.51          | 405        | 41.3  |      | [8, 9]        | NC_021529         |
| 15  | <i>Yersinia</i> phage JC221      | <i>Yersinia pestis</i> EV76-CN     | 174.93          | 274        | 41.2  |      | [10]          | MN508817          |
| 16  | <i>Yersinia</i> phage phiD1      | <i>Yersinia pestis</i>             | 167.06          | 277        | 35.5  |      | [11]          | NC_027353         |
| 17  | <i>Yersinia</i> phage PST        |                                    | 167.79          | 280        | 35.3  | 9    | [12]          | NC_027404         |
| 18  | <i>Yersinia</i> phage PYPS2T     | <i>Yersinia pseudotuberculosis</i> | 169.604         |            | 35.4  |      |               | NC_054944         |
| 19  | <i>Yersinia</i> phage PYps5T     | <i>Yersinia pseudotuberculosis</i> | 169.38          | 267        | 35.4  |      |               | MT828552          |
| 20  | <i>Yersinia</i> phage PYps10T    | <i>Yersinia pseudotuberculosis</i> | 169.49          | 270        | 35.4  |      |               | MT828553          |

|    |                                          |                                         |        |     |      |    |      |           |
|----|------------------------------------------|-----------------------------------------|--------|-----|------|----|------|-----------|
| 21 | <i>Yersinia</i> phage PYps11T            | <i>Yersinia pseudotuberculosis</i>      | 169.49 | 268 | 35.4 |    |      | MT515751  |
| 22 | <i>Yersinia</i> phage PYps14T            | <i>Yersinia pseudotuberculosis</i>      | 166.94 | 267 | 35.4 |    |      | MT526905  |
| 23 | <i>Yersinia</i> phage PYps15T            | <i>Yersinia pseudotuberculosis</i>      | 166.93 | 267 | 35.4 |    |      | MT515752  |
| 24 | <i>Yersinia</i> phage PYps32T            | <i>Yersinia pseudotuberculosis</i>      | 165.73 | 263 | 35.5 |    |      | MT515753  |
| 25 | <i>Yersinia</i> phage PYps35T            | <i>Yersinia pseudotuberculosis</i>      | 166.97 | 264 | 35.4 |    |      | MT515754  |
| 26 | <i>Yersinia</i> phage PYps47T            | <i>Yersinia pseudotuberculosis</i>      | 165.78 | 262 | 35.5 |    |      | MT515755  |
| 27 | <i>Yersinia</i> phage PYps55T            | <i>Yersinia pseudotuberculosis</i>      | 167.71 | 267 | 35.4 |    |      | MT515756  |
| 28 | <i>Yersinia</i> phage v_YepM_ZN18        | <i>Yersinia pseudotuberculosis</i>      | 167.95 | 275 | 35.4 | 11 |      | NC_054945 |
| 29 | <i>Yersinia</i> phage fPS-2              | <i>Yersinia pseudotuberculosis</i>      | 169.06 |     | 35.3 |    | [13] | NC_054943 |
| 30 | <i>Yersinia</i> phage fPS-65             | <i>Yersinia pseudotuberculosis</i>      | 167.06 |     | 35.3 |    | [13] | NC_055724 |
| 31 | <i>Yersinia</i> phage fPS-90             | <i>Yersinia pseudotuberculosis</i>      | 167.13 |     | 35.3 |    | [13] | NC_055723 |
| 32 | <i>Shigella</i> phage SP18               | <i>Shigella sonnei</i>                  | 170.61 | 289 | 40.4 | 3  | [14] | NC_014595 |
| 33 | <i>Enterobacteria</i> phage vB_EcoM_VR20 | <i>Escherichia coli</i>                 | 170.34 | 288 | 40.4 | 2  | [15] | NC_028894 |
| 34 | <i>Enterobacteria</i> phage vB_EcoM_VR25 | <i>Escherichia coli</i>                 | 170.82 | 295 | 40.4 | 2  | [16] | NC_028925 |
| 35 | <i>Enterobacteria</i> phage vB_EcoM_VR26 | <i>Escherichia coli</i>                 | 171.54 | 292 | 40.2 | 1  | [16] | NC_028957 |
| 36 | <i>Enterobacteria</i> phage vB_EcoM_VR7  | <i>Escherichia coli</i>                 | 169.29 | 294 | 40.3 | 1  | [15] | NC_014792 |
| 37 | <i>Escherichia</i> phage CJ20            | <i>Escherichia coli</i>                 | 169.88 | 307 | 40.4 |    |      | MT533174  |
| 38 | <i>Escherichia</i> phage DK-13           | <i>Escherichia coli</i>                 | 172.28 | 292 | 40.2 |    |      | MT611523  |
| 39 | <i>Escherichia</i> phage MN01            | enterotoxigenic <i>Escherichia Coli</i> | 172.58 | 290 | 40.4 | 2  |      | MT129652  |
| 40 | <i>Escherichia</i> phage P479            | <i>Escherichia coli</i> 187             | 172.03 | 288 | 40.3 |    | [17] | MW269952  |
| 41 | <i>Escherichia</i> phage P896            | <i>Escherichia coli</i>                 | 170.66 | 293 | 40.4 | 2  |      | OL451225  |
| 42 | <i>Escherichia</i> phage PSD2001         | <i>Escherichia coli</i>                 | 172.18 | 285 | 40.3 |    |      | OK254198  |
| 43 | <i>Escherichia</i> phage UPEC01          | <i>Escherichia coli</i>                 | 169.80 | 307 | 40.4 |    | [18] | MW233709  |

|    |                                                             |                                                  |        |     |      |  |      |          |
|----|-------------------------------------------------------------|--------------------------------------------------|--------|-----|------|--|------|----------|
|    |                                                             | <i>S3Lug</i>                                     |        |     |      |  |      |          |
| 44 | <i>Escherichia</i> phage UPEC07                             | <i>Escherichia coli</i>                          | 170.00 | 308 | 40.3 |  | [18] | MW250787 |
| 45 | <i>Escherichia</i> phage vB_EcoM_RZ                         | <i>Escherichia coli</i> str. K-12 substr. MG1655 | 170.32 | 291 | 40.1 |  |      | MW598459 |
| 46 | <i>Escherichia</i> virus TH15                               | <i>Escherichia coli</i>                          | 171.59 |     | 40.3 |  |      | MT446392 |
| 47 | <i>Escherichia</i> virus TH22                               | <i>Escherichia coli</i>                          | 170.09 |     | 40.3 |  |      | MT446396 |
| 48 | <i>Escherichia</i> virus TH40                               | <i>Escherichia coli</i>                          | 171.73 |     | 40.3 |  |      | MT446411 |
| 49 | <i>Escherichia</i> virus TH41                               | <i>Escherichia coli</i>                          | 170.56 |     | 40.5 |  |      | MT446412 |
| 50 | <i>Escherichia</i> virus TH44                               | <i>Escherichia coli</i>                          | 171.08 |     | 40.6 |  |      | MT446415 |
| 51 | <i>Escherichia</i> virus TH54                               | <i>Escherichia coli</i>                          | 170.99 |     | 40.4 |  |      | MT446420 |
| 52 | <i>Escherichia</i> virus TH55                               | <i>Escherichia coli</i>                          | 170.39 |     | 40.3 |  |      | MT446421 |
| 53 | <i>Escherichia</i> virus TH57                               | <i>Escherichia coli</i>                          | 171.23 |     | 40.4 |  |      | MT446422 |
| 54 | <i>Vibrio</i> phage KVP20 major capsid protein              | <i>Vibrio</i>                                    |        |     |      |  | [19] | D83517   |
| 55 | <i>Enterobacteria</i> phage Tula major capsid protein (g23) | <i>Escherichia coli</i>                          |        |     |      |  | [1]  | AF221994 |
| 56 | <i>Enterobacteria</i> phage KC69 major capsid protein (g23) | <i>Escherichia coli</i>                          |        |     |      |  |      | AF221999 |

#### Reference:

1. Tetart F, Desplats C, Kutateladze M, Monod C, Ackermann HW, Krisch HM. Phylogeny of the major head and tail genes of the wide-ranging T4-type bacteriophages. *J Bacteriol.* 2001;183(1):358-66. Epub 2000/12/15. doi: 10.1128/JB.183.1.358-366.2001. PubMed PMID: 11114936; PubMed Central PMCID: PMC94885.
2. Liao WC, Ng WV, Lin IH, Syu WJ, Liu TT, Chang CH. T4-Like genome organization of the *Escherichia coli* O157:H7 lytic phage AR1. *J Virol.* 2011;85(13):6567-78. Epub 2011/04/22. doi: 10.1128/JVI.02378-10. PubMed PMID: 21507986; PubMed Central PMCID: PMC3126482.
3. Denou E, Bruttin A, Barretto C, Ngom-Bru C, Brussow H, Zuber S. T4 phages against *Escherichia coli* diarrhea: potential and problems. *Virology.* 2009;388(1):21-30. Epub 2009/04/03. doi: 10.1016/j.virol.2009.03.009. PubMed PMID: 19339031.
4. Chibani-Chennoufi S, Canchaya C, Bruttin A, Brussow H. Comparative genomics of the T4-Like *Escherichia coli* phage JS98: implications for the evolution of T4 phages. *J Bacteriol.* 2004;186(24):8276-86. Epub 2004/12/04. doi: 10.1128/JB.186.24.8276-8286.2004. PubMed PMID: 15576776; PubMed Central PMCID: PMC3126421.
5. Desplats C, Krisch HM. The diversity and evolution of the T4-type bacteriophages. *Res Microbiol.* 2003;154(4):259-67. Epub 2003/06/12. doi: 10.1016/S0923-2508(03)00069-X. PubMed PMID: 12798230.

6. Miller ES, Kutter E, Mosig G, Arisaka F, Kunisawa T, Ruger W. Bacteriophage T4 genome. *Microbiol Mol Biol Rev.* 2003;67(1):86-156, table of contents. Epub 2003/03/11. doi: 10.1128/MMBR.67.1.86-156.2003. PubMed PMID: 12626685; PubMed Central PMCID: PMCPMC150520.
7. Miller ES, Heidelberg JF, Eisen JA, Nelson WC, Durkin AS, Ciecko A, et al. Complete genome sequence of the broad-host-range vibriophage KVP40: comparative genomics of a T4-related bacteriophage. *J Bacteriol.* 2003;185(17):5220-33. Epub 2003/08/19. doi: 10.1128/JB.185.17.5220-5233.2003. PubMed PMID: 12923095; PubMed Central PMCID: PMCPMC180978.
8. Comeau AM, Bertrand C, Letarov A, Tetart F, Krisch HM. Modular architecture of the T4 phage superfamily: a conserved core genome and a plastic periphery. *Virology.* 2007;362(2):384-96. Epub 2007/02/10. doi: 10.1016/j.virol.2006.12.031. PubMed PMID: 17289101.
9. Comeau AM, Arbiol C, Krisch HM. Composite conserved promoter-terminator motifs (PeSLs) that mediate modular shuffling in the diverse T4-like myoviruses. *Genome Biol Evol.* 2014;6(7):1611-9. Epub 2014/06/22. doi: 10.1093/gbe/evu129. PubMed PMID: 24951563; PubMed Central PMCID: PMCPMC4122927.
10. Yuan Y, Xi H, Dai J, Zhong Y, Lu S, Wang T, et al. The characteristics and genome analysis of the novel *Y. pestis* phage JC221. *Virus Res.* 2020;283:197982. Epub 2020/04/22. doi: 10.1016/j.virusres.2020.197982. PubMed PMID: 32315702.
11. Skurnik M, Jaakkola S, Mattinen L, von Ossowski L, Nawaz A, Pajunen MI, et al. Bacteriophages fEV-1 and fD1 Infect *Yersinia pestis*. *Viruses.* 2021;13(7). Epub 2021/08/11. doi: 10.3390/v13071384. PubMed PMID: 34372590; PubMed Central PMCID: PMCPMC8309999.
12. Rashid MH, Revazishvili T, Dean T, Butani A, Verratti K, Bishop-Lilly KA, et al. A *Yersinia pestis*-specific, lytic phage preparation significantly reduces viable *Y. pestis* on various hard surfaces experimentally contaminated with the bacterium. *Bacteriophage.* 2012;2(3):168-77. Epub 2013/01/01. doi: 10.4161/bact.22240. PubMed PMID: 23275868; PubMed Central PMCID: PMCPMC3530526.
13. Salem M, Pajunen MI, Jun JW, Skurnik M. T4-like Bacteriophages Isolated from Pig Stools Infect *Yersinia pseudotuberculosis* and *Yersinia pestis* Using LPS and OmpF as Receptors. *Viruses.* 2021;13(2). Epub 2021/03/07. doi: 10.3390/v13020296. PubMed PMID: 33668618; PubMed Central PMCID: PMCPMC7917993.
14. Kim KH, Chang HW, Nam YD, Roh SW, Bae JW. Phenotypic characterization and genomic analysis of the *Shigella sonnei* bacteriophage SP18. *J Microbiol.* 2010;48(2):213-22. Epub 2010/05/04. doi: 10.1007/s12275-010-0055-4. PubMed PMID: 20437154.
15. Kaliniene L, Klaus V, Truncaite L. Low-temperature T4-like coliphages vB\_EcoM-VR5, vB\_EcoM-VR7 and vB\_EcoM-VR20. *Arch Virol.* 2010;155(6):871-80. Epub 2010/04/03. doi: 10.1007/s00705-010-0656-6. PubMed PMID: 20361343.
16. Kaliniene L, Zajanckauskaite A, Simoliunas E, Truncaite L, Meskys R. Low-temperature bacterial viruses VR - a small but diverse group of *E. coli* phages. *Arch Virol.* 2015;160(5):1367-70. Epub 2015/03/11. doi: 10.1007/s00705-015-2388-0. PubMed PMID: 25753428.
17. Li P, Wang H, Li M, Qi W, Qi Z, Chen W, et al. Characterization and genome analysis of a broad lytic spectrum bacteriophage P479 against multidrug-resistant *Escherichia coli*. *Virus Res.* 2022;308:198628. Epub 2021/11/16. doi: 10.1016/j.virusres.2021.198628. PubMed PMID: 34780885.
18. Kazibwe G, Ndekezi C, Alinaitwe R, Alafi S, Nanteza A, Kimuda MP, et al. Genome Sequences of Bacteriophages UPEC01, UPEC03, UPEC06, and UPEC07 Infecting Avian Pathogenic *Escherichia coli*.

Microbiol Resour Announc. 2022;11(3):e0081121. Epub 2022/03/10. doi: 10.1128/mra.00811-21. PubMed PMID: 35262399; PubMed Central PMCID: PMC8928767.

19. Matsuzaki S, Inoue T, Kuroda M, Kimura S, Tanaka S. Cloning and sequencing of major capsid protein (mcp) gene of a vibriophage, KVP20, possibly related to T-even coliphages. Gene. 1998;222(1):25-30. Epub 1998/11/14. doi: 10.1016/s0378-1119(98)00459-4. PubMed PMID: 9813227.
