# Supplementary material for: Two Novel Yersinia pestis Bacteriophages with a Broad Host Range: Potential as Biocontrol Agents in Plague Natural Foci
Source: MDPI journal article supplement (doi:10.3390/v14122740), 2022-12-08
Supplement: s1 [file s1]

(a)

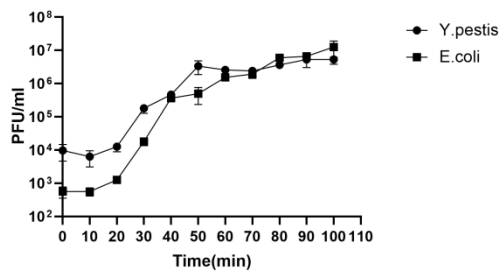

(b)

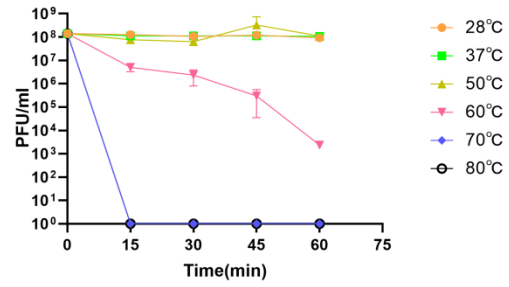

(c)

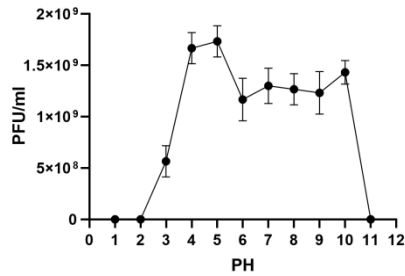

Supplemental Figure S1-A. Growth characteristics and stability test of MHS112 bacteriophage.

(a) Growth curve of MHS112 on *Y. pestis* (EV76) and *E. coli* (CMCC43201); Thermo Stability test (b) and pH stability test (c) of phage MHS112 on *Y. pestis* (EV76). The Y-axis shows the plaque-forming units per milliliter (PFU/mL). Each assay was performed as three repetitions, and the values represented are the means.

(a)

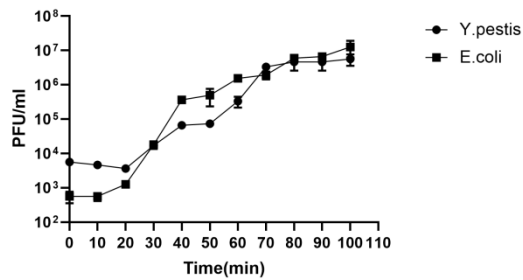

(b)

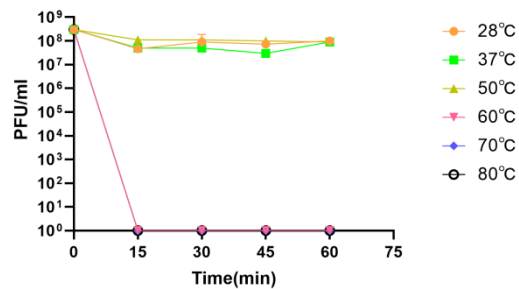

(c)

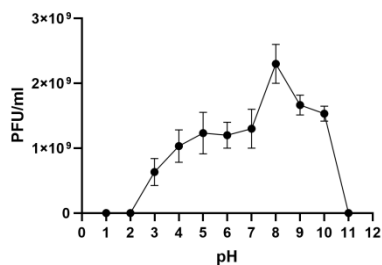

Supplemental Figure S1-B. Growth characteristics and stability test of GMS130 bacteriophage. (a) Growth curve of GMS130 on *Y. pestis* (EV76) and *E. coli* (CMCC43201); Thermo stability test (b) and pH stability test (c) of phage GMS130 on *Y. pestis* (EV76). The Y-axis shows the plaque-forming units per milliliter (PFU/mL). Each assay was performed as three repetitions, and the values represented are the means.
